# Supplementary material for: Investigation of the structural, optical and gas sensing properties of PANI coated Cu–ZnS microsphere composite
Source: Royal Society of Chemistry journal article supplement (doi:10.1039/d0ra04991c), 2020-01-01
Supplement: d0ra04991c1.pdf [file d0ra04991c1.pdf]

## Investigation of the structural, optical and gas sensing properties of PANI coated Cu-ZnS microsphere composite

Hemalatha Parangusan<sup>1</sup>, Jolly Bhadra<sup>1</sup>, Zubair Ahmad<sup>1</sup>, Shoaib Mallick<sup>2</sup>, Farid Touati<sup>2</sup>  
and Noora Al-Thani\*<sup>1</sup>

<sup>1</sup>Centre for Advanced Materials (CAM), Qatar University, P.O. Box 2713 Doha, Qatar.

<sup>2</sup>Department of Electrical Engineering, College of Engineering, Qatar University, P.O. Box 2713 Doha, Qatar.

\*Email-n.al-thani@qu.edu.qa

**Table S1:** Thickness of the PANI/Cu-ZnS composite films.

| Film thickness on substrate<br>(nm) | Film Thickness on Electrodes<br>(nm) |
|-------------------------------------|--------------------------------------|
| 410                                 | 300                                  |
| 427                                 | 318                                  |
| 448                                 | 316                                  |
| 400.9                               | 315                                  |
| 400.8                               | 292                                  |
| Average= $417.34 \pm 20.19$         | Average= $308.2 \pm 11.54$           |

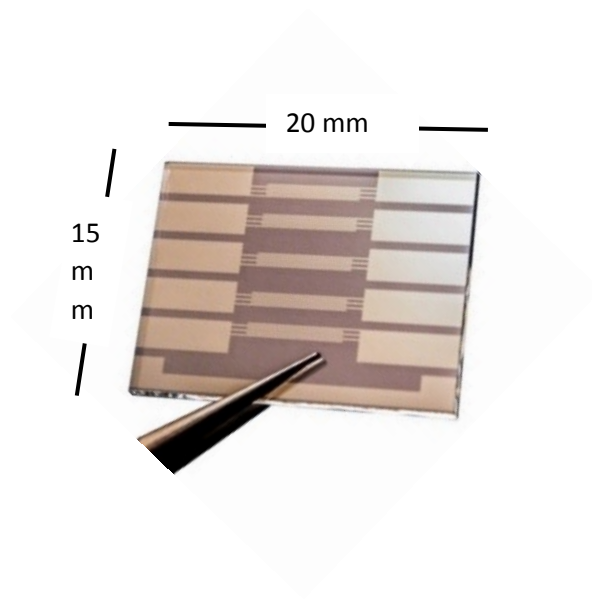

Fig. S1. Interdigitated ITO/glass substrate
